# Supplementary material for: Nucleosome destabilization by nuclear non-coding RNAs
Source: PubMed Central journal article supplement (PMC7012929; doi:10.1038/s42003-020-0784-9), 2020-02-11
Supplement: 42003_2020_784_MOESM2_ESM.pdf [file 42003_2020_784_MOESM2_ESM.pdf]

## Description of Additional Supplementary Files

**File Name:** Supplementary Data 1

**Description:** Data used for real-time PCR quantification in Figures 1c, 1f, 5a, and 5e.

**File Name:** Supplementary Data 2

**Description:** The RNA sequences employed for the thermal stability assay in Figure 4.
